# Supplementary material for: Detection of EGFR Mutations in Plasma cfDNA and Paired CTCs of NSCLC Patients before and after Osimertinib Therapy Using Crystal Digital PCR
Source: MDPI journal article supplement (doi:10.3390/cancers13112736), 2021-05-31
Supplement: s1 [file s1]

**Supplementary Table S1:** Differences between cobas® EGFR mutation test and ID-solutions kits

| EGFR Mutation group | EGFR nucleic acid sequence           | COSMIC ID | cobas EGFR test | ID-solutions tests |
|---------------------|--------------------------------------|-----------|-----------------|--------------------|
| EXON 18<br>G719X    | c.2156 G>C                           | 6239      | ×               | ×                  |
|                     | c.2155 G>A                           | 6252      | ×               | ×                  |
|                     | c.2155 G>T                           | 6253      | ×               | ×                  |
|                     | c.2154-2155 GG>TT                    | 18441     |                 | ×                  |
|                     | c.2156 G>A                           | 18425     |                 | ×                  |
| EXON19<br>DELETIONS | c.2240_2251del12                     | 6210      | ×               | ×                  |
|                     | c.2239_2247del9TTAAGAGAA             | 6218      | ×               | ×                  |
|                     | c.2238_2255del18                     | 6220      | ×               | ×                  |
|                     | c.2235_2249del15                     | 6223      | ×               | ×                  |
|                     | c.2236_2250del15                     | 6225      | ×               | ×                  |
|                     | c.2239_2253del15                     | 6254      | ×               |                    |
|                     | c.2239_2256del18                     | 6255      | ×               | ×                  |
|                     | c.2237_2254del18                     | 12367     | ×               | ×                  |
|                     | c.2240_2254del15                     | 12369     | ×               | ×                  |
|                     | c.2240_2257del18                     | 12370     | ×               | ×                  |
|                     | c.2239_2248TTAAGAGAAG>C<br>(complex) | 12382     | ×               | ×                  |
|                     | c.2239_2251>C(complex)               | 12383     | ×               | ×                  |
|                     | c.2237_2255>T(complex)               | 12384     | ×               | ×                  |
|                     | c.2235_2255>AAT                      | 12385     | ×               |                    |
|                     | c.2237_2252>T                        | 12386     | ×               | ×                  |
|                     | c.2239_2258>CA(complex)              | 12387     | ×               | ×                  |
|                     | c.2239_2256>CAA                      | 12403     | ×               | ×                  |

|                      |                          |       |   |   |
|----------------------|--------------------------|-------|---|---|
|                      | c.2237_2253>TTGCT        | 12416 | × |   |
|                      | c.2238_2252>GCA(complex) | 12419 | × | × |
|                      | c.2238_2248>GC(complex)  | 12422 | × | × |
|                      | c.2237_2251del15         | 12678 | × | × |
|                      | c.2236_2253del18         | 12728 | × | × |
|                      | c.2235_2248>AATTC        | 13550 | × |   |
|                      | c.2235_2252>AAT(complex) | 13551 | × | × |
|                      | c.2235_2251>AATTC        | 13552 | × |   |
|                      | c.2253_2276del24         | 13556 | × |   |
|                      | c.2237_2257>TCT          | 18427 | × |   |
|                      | c.2238_2252del15         | 23571 | × | × |
|                      | c.2233_2247del15         | 26038 | × |   |
|                      | c.2236_2253> ACG         | /     |   | × |
|                      | c.2239_2250>CCC          | /     |   | × |
|                      | c.2239_2261>CAATT        | /     |   | × |
|                      | c.2238_2261>GCAACATCT    | /     |   | × |
|                      | c.2238_2256>GCAA         | /     |   | × |
|                      | c.2236_2248>CAAC         | 13557 |   | × |
|                      | c.2236_2253>CAA          | 22999 |   | × |
|                      | c.2239_2256del18         | 6255  |   | × |
| EXON 20 S768I        | c.2303G>T                | 6241  | × | × |
| EXON20<br>INSERTIONS | c.2307_2308ins9GCCAGCGTG | 12376 | × | × |
|                      | c.2319_2320insCAC        | 12377 | × | × |
|                      | c.2310_2311insGGT        | 12378 | × | × |
|                      | c.2311_2312ins9GCGTGGACA | 13428 | × | × |

|                  |                           |         |   |   |
|------------------|---------------------------|---------|---|---|
|                  | c.2309_2310AC>CCAGCGTGGAT | 13558   | × | × |
| EXON 20<br>T790M | c.2369C>T                 | 6240    | × | × |
| EXON 21 L858R    | c.2573T>G                 | 6224    | × | × |
|                  | c.2573_2574TG>GT          | 12429   | × | × |
| EXON 21<br>L861Q | c.2582T>A                 | 6213    | × | × |
| EXON 21 C797S    | c.2389T>A                 | 6493937 |   | × |
|                  | c.2390G>C                 | 5945664 |   | × |
